# Supplementary material
Source: publisher figshare collection journal article supplement (https://tandf.figshare.com/ndownloader/files/20047571)
Supplement: Supplementary file 1 [file 20047571]

**Supplementary Data**

Synthesis, Crystal Structure and Biological evaluation of 2,9-Bis(2,3-difluorobenzyl)-β-carbolineum Bromide as Anticancer Agent

Mazlin Mohideena,b*, Nur Azzalia Kamaruzamanc, Faizan Naeem Razalia, Mohd Nizam Mordib and Sharif Mahsufi Mansorb

aFaculty of Pharmacy and Health Sciences, Universiti Kuala Lumpur-Royal College of Medicine Perak (UniKL-RCMP), 30450 Ipoh, Perak, Malaysia;

bCentre for Drug Research, Universiti Sains Malaysia (USM), 11800 Minden, Pulau Pinang, Malaysia.

cNational Poison Centre, Universiti Sains Malaysia (USM), 11800 Minden, Pulau Pinang, Malaysia.

*Correspondent author: Mazlin Mohideen. Tel.: +605-243 2635; Ext. 854; E-mail: [mazlin.mohideen@unikl.edu.my](mailto:mazlin.mohideen@unikl.edu.my)

1H NMR of compound **2**:

13C NMR of compound **2**:

ESI-MS of compound **2**:

j
